# Supplementary material for: Inheritance, QTLs, and Candidate Genes of Lint Percentage in Upland Cotton
Source: Front Genet. 2022 Mar 31;13:855574. doi: 10.3389/fgene.2022.855574 (PMC9016478; doi:10.3389/fgene.2022.855574)
Supplement: Supplementary file 1 [file Table2.XLSX]

## Sheet: Sheet1
Table S2.The unique QTLs for LP
QTL	Chromosome	Position	LOD	PVE
qLP-A1-1	Chr01	0	1.35	3.1
qLP1-1-2	Chr01	9	3.94	7.3
qLP01.1	Chr01	27.7	2.1	5.3
qLP-chr1-1	Chr01	59.31	2.9718	6.4664
qTL-LP-E2-Chr1-1	Chr01	64.129	0	15
qTL-LP-E2-Chr1-2	Chr01	74.634	0	15
qLP-chr1-1	Chr01	85.83	3	7.84
qLP-chr1-1	Chr01	94.44	3.75	8.12
qLP-chr1-2	Chr01	165.31	2.20607	4.8884
qLP-A2-1	Chr02	1.87	4.9	10.7
LP1.w	Chr02	22.9	7.37	17.48
qLP-chr2-2	Chr02	31.61	3.05	5.95
qLP-chr2-1	Chr02	38.61	3.19306	7.3152
qLP-A2	Chr02	49.6	0	0
qLP-chr2-2	Chr02	72.71	4.06291	8.7042
qLP-chr2-3	Chr02	126.01	2.91974	6.4211
qLP-chr2-4	Chr02	142.31	2.86768	6.2434
qLP-chr3-1	Chr03	0.01	3.30369	6.7951
LP2a	Chr03	3	3	1
qLP-3c(F2)	Chr03	7	2.01	6.96
qLP-3(2011)	Chr03	8.2	2.76	13.2
qLP-3(2010)	Chr03	9.9	5.29	29.6
LP_3	Chr03	11.3	9.29	12.1
qLP-3b(F2)	Chr03	13.1	5.13	23.47
qLP-A3-1	Chr03	14.01	4.59	11.14
QTLLP1.j	Chr03	15.6	3	11.47
QTLLP4.j	Chr03	18.6	3	7.88
qLP-A3-1	Chr03	22.9	7.37	17.48
qLP-3-1	Chr03	26.54	3.2	20.1
LP1.q	Chr03	31.3	2.9	22.5
qLP-chr3-2	Chr03	42.71	3.17354	6.9375
qLP-A3-2	Chr03	46.16	3.89	10.9
QTLLP2.d	Chr03	47.5	2.02	16.9
qLP-chr3-3	Chr03	51.31	3.34056	7.6938
qLP-3a(F2)	Chr03	56.2	2.65	13.27
qLP-chr3-4	Chr03	60.31	3.24078	7.0303
qTL-LP-E3-Chr3	Chr03	63.784	0	21.0787
qLP-chr3-5	Chr03	68.31	3.88069	7.9228
qLP-chr3-6	Chr03	81.81	3.47722	7.3761
qLP-chr3-7	Chr03	87.21	3.45987	7.3381
qLP-A3-2	Chr03	102	0	0
qLP-3-12	Chr03	105.29	5.28	8.01
qLP-chr3-8	Chr03	137.31	2.77874	9.7782
qLP-A03-1	Chr03	259.81	4.32	3.25
LP_4	Chr04	0	6.16	6.2
QTLLP1.d	Chr04	4.01	2.39	6.9
qLP-Chr04-2	Chr04	11.11	3.28	7.49
qLP-Chr04-1	Chr04	11.41	3.5	8.2
qLP-chr4-1a	Chr04	46.02	2.83	5.37
qLP-chr4-1b	Chr04	50.02	2.38	6.61
LP4a	Chr04	53.3	3	1
qLP-chr4-1	Chr04	98.01	2.16703	6.5551
qLP-16-CH4-1	Chr04	111.13	5.4	7.4
qLP-chr4-2	Chr04	129.11	2.62256	5.564
qLP-chr4-3	Chr04	132.71	3.52711	7.5228
qLP-chr4-4	Chr04	134.61	5.97831	12.1883
qLP-chr4-5	Chr04	142.81	2.59002	5.7917
qLP-chr4-6	Chr04	144.41	5.68547	11.6223
qLP-chr4-7	Chr04	150.51	5.37093	11.0332
qLP-chr4-8	Chr04	157.51	4.91757	10.6488
qLP-A5-2	Chr05	0.01	2.65	7.37
qLP-08A-c5-1	Chr05	2	2.87	18.06
qLP-chr5-1	Chr05	3.51	2.52278	6.2762
qLP-A5-2	Chr05	11.91	5.48	14.87
qLP-A5-2a	Chr05	30.61	3.23	7.52
qLP-chr5-1b	Chr05	38.92	6.68	16.18
qLP-chr5-1a	Chr05	46.92	3.76	9.33
qLP-A5	Chr05	106.1	0	0
qLP-chr5-2	Chr05	132.11	2.48156	5.3443
qLP-C5-1	Chr05	145.3	3.88	7.5
qLP-C5-2	Chr05	151.1	3.23	6.84
qLP-C5-3	Chr05	156.8	2.52	5.4
qLP-chr5-3	Chr05	168.01	5.04989	10.7167
qLP-chr5-4	Chr05	171.21	3.46421	6.8707
qLP-chr5-5	Chr05	204.71	2.94794	6.0154
qLP-F2:3-A6-1#	Chr06	15.41	4.91	6.02
qLP-6-3	Chr06	18.26	3.08	2.93
qLP-chr6-1a	Chr06	24.01	3.41	14.32
qLP-c6-1	Chr06	27.73	3.07	7.15
qLP-c6-2	Chr06	31.4	3	6.03
qLP-A6	Chr06	34.9	0	0
qLP-chr6-1	Chr06	39.91	3.0564	6.2637
qLP-c6	Chr06	46.29	4.86	0.1161
qLP-chr6-2	Chr06	47.51	2.28633	4.7256
qLP-chr6-1c	Chr06	60.53	3.22	6.6
qLP06.1	Chr06	63.2	4.7	8.6
qLP-chr6-3	Chr06	84.61	4.05423	8.8425
qLP-chr6-4	Chr06	90.31	3.00217	6.6065
qLP-chr6-5	Chr06	143.01	2.38612	5.1614
qLP-chr6-6	Chr06	193.81	3.47289	7.3181
QTLLP1.e	Chr07	2	4.8	13
qLP07.1	Chr07	7.8	20.9	36.7
QTLLP27.m	Chr07	11.91	3.86	9.45
QTLLP28.m	Chr07	14.91	3.3	13.48
QTLLP26.m	Chr07	15.91	5.94	8.42
QTLLP25.m	Chr07	16.91	3.8	8.45
qLP-07X-c7-1	Chr07	22.2	2.73	16.67
QTLLP30.m	Chr07	22.81	6.7	4.5
QTLLP31.m	Chr07	23.81	3.5	4.8
QTLLP29.m	Chr07	24.81	4.42	9.3
qLP-chr7-1	Chr07	38.11	2.10195	4.6568
qLP-chr7-2	Chr07	55.41	2.43818	5.0513
qLP-c7-1	Chr07	56.7	4.84	8.97
qLP-08A-c7-1	Chr07	57.7	3.33	15.19
QTLLP1.n	Chr07	58.4	2.85	7.28
qLP-chr7-3	Chr07	65.01	2.45336	5.573
qLP-chr7-4	Chr07	72.01	4.75271	9.7967
qLP-chr7-5	Chr07	80.01	3.01735	6.5003
qLP-chr7-1a	Chr07	82.41	6.69	14.5
qLP-chr7-6	Chr07	90.61	2.97397	6.371
qGhLP-c7	Chr07	107.8	0	4.13
qLP-chr7-7	Chr07	115.41	0.490239	1.0363
qLP-chr7-8	Chr07	152.71	2.69631	5.7026
qLP-chr7-9	Chr07	154.21	2.59436	6.0274
LP1a	Chr08	7.1	3	1
LP2a	Chr08	41.8	3	1
qLP-chr8-2	Chr08	65.41	4.3449	8.9983
qLP-16-CH8-1	Chr08	69.56	5.8	7.6
qLP-chr8-3	Chr08	71.71	4.38829	9.0739
qLP-chr8-4	Chr08	75.71	2.47722	5.3582
qLP-chr8-5	Chr08	83.51	1.93275	5.2647
qGhLP-c8	Chr08	157	0	5.73
LPQTL3.a	Chr09	0	2.57	5.9
LPQTL2.a	Chr09	16	6.97	24.9
qLP9-1-1	Chr09	19	3.23	3.35
LP_9	Chr09	23.6	4.94	5.4
qLP-F2:3-A9-1	Chr09	26.71	3.41	7.03
LPQTL1.a	Chr09	28	6.12	25
qLP-chr9-1	Chr09	55.91	2.44469	5.2822
qLP-A9	Chr09	60.3	0	0
qLP-chr9-2	Chr09	74.01	3.40781	7.0674
qLP09.1	Chr09	86.4	2.1	3.5
qGhLP-c9	Chr09	89.23	0	3.85
qLP-chr9-3	Chr09	96.41	2.66377	5.9071
qTL-LP-E3-Chr9	Chr09	104	0	18.6359
qLP-chr9-4	Chr09	147.21	2.42082	5.3006
qLP-chr9-5	Chr09	162.01	2.8026	5.9065
qLP-C9-1	Chr09	189.5	2.55	4.73
LPQTL4.a	Chr10	0	2.99	7
qLP-chr10-2	Chr10	13.41	2.5423	5.9092
qLP-Chr10-2	Chr10	33.21	2.68	20.71
qLP-Chr10-1	Chr10	35.11	4.2	8.86
qLP-A10-1	Chr10	48.6	4.97	14.5
qLP-chr10-3	Chr10	57.11	2.29718	6.9192
qLP-C10-1	Chr10	85.3	3.09	5.92
qLP-C10-2	Chr10	87.8	3.28	6.75
qGhLP-c10-1	Chr10	134.4	0	4.38
qLP-chr10-4	Chr10	136.21	3	6.6181
qGhLP-c10-2	Chr10	152	0	4.65
qLP-chr10-5	Chr10	179.91	4.03471	10.6472
qLP-chr10-6	Chr10	192.11	3.85249	8.3266
qLP-chr10-7	Chr10	196.31	2.39913	5.3488
qLP-c11-2	Chr11	1.32	2.19	6.1
LP3.w	Chr11	14.6	3.68	6.68
qLP11-1-2	Chr11	17	7	13.8
qLP-c11-1	Chr11	20	5.2	28.4
qLP-chr11-1	Chr11	26.01	2.07158	4.6263
qLP-A11-1	Chr11	41.22	3.18	6.27
qLP-chr11-1	Chr11	73.77	3.2	8.36
qLP-chr11-2	Chr11	97.51	2.77223	6.5024
qLP-11-11	Chr11	103.87	2.7	4.04
qLP-chr11-3	Chr11	104.41	3.68113	7.9022
qLP-c12-1	Chr12	0	2.69	7.3
qLP-Chr12-1	Chr12	4.01	3.38	10.42
LP_12	Chr12	20.5	7.59	7.8
qLP-chr12-1	Chr12	31.31	2.44902	4.7502
qLP-chr12-1	Chr12	34.01	3.64	13.88
LP2.o	Chr12	54.7	76.4	80.1
qLP12.1	Chr12	70	58.2	63.4
qLP-C12-1	Chr12	105.7	4.41	9.24
qLP-A12-1	Chr12	114.23	2.88	2.84
qLP-12-13	Chr12	119.69	5.15	11.16
qLP-12-13	Chr12	119.69	9.43	5.05
qLP-chr12-3	Chr12	129.21	2.21475	4.644
qLP-C12-2	Chr12	131.9	2.65	7.21
qTL-LP-E4-Chr12	Chr12	184.6	0	17.0839
qTL-LP-E1-Chr12	Chr12	193.901	0	12
qLP-c13--1	Chr13	0.01	5.79	11.08
qLP-c13--2	Chr13	5.84	6.66	12.5
qLP-F2:3-A13-2	Chr13	16.61	2.91	7.4
qLP-c13	Chr13	19.28	4.53	10.7
qLP-13-5	Chr13	27.46	3.27	5
qLP-chr13-1	Chr13	35.81	2.44252	5.6682
QTLLP5.m	Chr13	43.01	4.89	6.52
qLP-C13-1	Chr13	47.4	6.69	8.87
QTLLP1.m	Chr13	47.81	9.75	21.93
QTLLP6.m	Chr13	48.81	3.47	11.15
QTLLP2.m	Chr13	49.81	6.72	14.34
qLP-chr13-2	Chr13	53.01	2.30803	4.796
QTLLP11.m	Chr13	54.91	7.33	7.1
QTLLP10.m	Chr13	58.61	10.58	16.73
QTLLP12.m	Chr13	59.91	4.57	8.07
QTLLP13.m	Chr13	64.71	3.14	5.99
qLP-Chr13-1	Chr13	71.95	5.28	0.4624
qLP-Chr13-2	Chr13	78.8	5.38	0.5929
qLP-A13	Chr13	81.6	0	0
qLP-chr13-1c	Chr13	96.39	2.09	4.8
qLP-chr13-4	Chr13	110.51	2.57701	4.9452
qLP-chr13-5	Chr13	124.01	2.27983	4.4747
qLP-chr13-6	Chr13	127.41	3.02169	5.8335
qLP-chr13-7	Chr13	133.61	4.78091	9.0442
qLP-chr13-1b	Chr13	140.49	4.33	10.7
qLP-chr13-8	Chr13	147.11	2.27549	4.5948
qLP-chr13-9	Chr13	170.31	2.91974	5.9857
qLP-chr13-10	Chr13	177.31	4.00434	8.3479
qLP-chr13-11	Chr13	187.61	5.11931	10.5239
qLP-chr14-1	Chr14	0.01	4.28633	9.0367
QTLLP2.e	Chr14	7	4.7	14.3
qLP-chr14-2	Chr14	8.81	3.79393	8.1714
qLP-chr14-3	Chr14	14.51	3.47505	7.5421
qLP-c15-1	Chr14	22.5	3.96	7.59
qLP-D1-1	Chr14	23.72	4.04	28.3
qLP-C15-1	Chr14	49.4	2.63	5.89
qLP-D1	Chr14	53.5	0	0
qLP-C15-2	Chr14	55.2	3.31	7.09
qLP-D1-2	Chr14	57.87	3.21	3.57
LP1a	Chr14	61.7	3	1
qLP-chr14-5	Chr14	65.21	2.98915	6.4227
qLP-17-CH14-1	Chr14	68.84	11.1	15.2
qLP-chr14-6	Chr14	104.61	5.09761	10.5829
qLP-chr14-7	Chr14	111.61	2.98482	6.1932
qLP-chr14-8	Chr14	116.01	3.63341	7.6622
qTL-LP-E4-Chr15	Chr14	159.537	0	22.2294
qLP-chr14-9	Chr14	212.21	2.87419	6.2099
qLP-D2-1	Chr15	0.01	4.14534	8.6857
qLP-D2-1	Chr15	4	3.06	32.2
qLP-15-1	Chr15	9.21	9.61	6.9
qLP-D2-1	Chr15	13.4	8.04	14.4
qLP-15-1	Chr15	24.41	7.35	19.86
qLP-17-CH15-1	Chr15	31.04	5.1	6.1
qLP-15-2	Chr15	33.25	6.35	18.47
qLP-D2	Chr15	45.8	0	0
qLP-chr15-1	Chr15	74.71	2.42733	7.505
QTLLP3.j	Chr15	89.3	3	13.29
LPcQtlc14_1h	Chr15	108.1	3.37	9.8
qLP15-1-3	Chr15	111	3.22	9.72
qLP14.1	Chr15	124.5	2.4	6
qLP-C14-1	Chr15	133	2.99	6.09
qLP-C14-2	Chr15	135.8	2.82	5.76
qLP-chr15-2	Chr15	148.31	2.18004	5.3358
qLP-chr20-1	Chr16	0.01	3.57	7.02
qLP-c20	Chr16	83.67	5.77	13.43
qLP-chr16-1	Chr16	109.11	3.718	7.7162
qLP-chr16-2	Chr16	123.41	2.5705	5.2652
qLP-chr16-3	Chr16	125.71	2.99132	5.5027
qLP-chr16-4	Chr16	128.81	2.8243	5.8642
qLP-chr16-5	Chr16	142.01	4.11497	7.8768
qLP-chr16-6	Chr16	153.21	5.36659	10.8135
qLP‐C16‐6	Chr16	177.7	4.39	10.11
qLP‐C16‐7	Chr16	189.3	5.79	11.6
qLP-chr16-7	Chr16	237.01	3.00217	6.1846
QTLLP16.m	Chr17	3.01	4.44	8.45
QTLLP21.m	Chr17	10.61	3.34	3.5
QTLLP18.m	Chr17	11.81	5.72	9.01
QTLLP19.m	Chr17	12.81	5.54	9.1
QTLLP22.m	Chr17	17.31	7.42	12.41
QTLLP23.m	Chr17	19.41	6.33	9.56
qLP-17-5	Chr17	23.34	2.45	4.01
qLP-17-7	Chr17	47.26	4.25	7.1
LP1.x	Chr17	47.5	2.4	10.1
qLP-chr17-1	Chr17	51.41	2.26898	5.3898
qLP-D7-1	Chr17	52.5	0	0
qLP-17-8	Chr17	56.36	2.37	4.4
qLP-08A-c16-1	Chr17	64.85	3.84	17.5
qLP-08A-c16-2	Chr17	69.5	4.2	17.64
qLP-chr17-2	Chr17	71.81	2.89805	5.9707
qLP‐C17‐1	Chr17	91.3	10.81	27.51
qLP‐C17‐2	Chr17	94.9	11.7	26.4
qLP-D7-2	Chr17	99.9	0	0
qLP-chr17-4	Chr17	115.41	2.44685	5.4472
qLP-chr17-5	Chr17	116.81	2.21692	4.9658
qLP-C16-1	Chr17	137.1	3.55	10.53
qLP-C16-2	Chr17	143.2	6.29	14.74
qLP-C16-3	Chr17	148	7.52	17.21
qLP-C16-4	Chr17	152	6.41	15.07
qLP-C16-5	Chr17	156.1	5.12	13.42
qLP-C16-6	Chr17	177.7	4.39	10.11
qLP-C16-7	Chr17	189.3	5.79	11.6
qLP-C16-8	Chr17	192.8	4.1	9.39
qLP-26b(F2)	Chr18	2	2.32	7.94
qLP-26a(F2)	Chr18	13.3	2.61	6.96
qLP-c26-1	Chr18	19	5.79	87.1
LP_26	Chr18	30.3	5.8	6.6
qLP-26(F2:3)	Chr18	44.9	2.4	11.62
qLP-chr18-1	Chr18	47.01	2.47939	5.036
qLP26.1	Chr18	49.5	3	5.7
qLP-chr18-2	Chr18	59.71	2.8308	9.0055
qGhLP-c26-1	Chr18	60.22	0	4.47
qLP-D12	Chr18	72	0	0
qLP-chr26-1b	Chr18	79.42	2.47	7.36
qLP-chr26-1a	Chr18	88.09	2.95	6.43
qLP-chr18-3	Chr18	105.21	3.32538	7.1743
qLP-chr18-4	Chr18	166.71	2.43167	5.5168
qLP-chr18-5	Chr18	190.61	2.3167	4.2711
qLP-D13-1	Chr19	0	1.16	2.7
qLP-chr19-1	Chr19	8.01	2.71584	5.6341
qLP-F2:3-D5-1	Chr19	18.11	2.53	4.6
qLP-chr19-2	Chr19	34.91	2.60087	5.4392
qLP-F2:3-D5-2#	Chr19	52.01	5.98	15.19
qLP-D13	Chr19	81.8	0	0
qLP-chr19-3	Chr19	139.41	2.68113	5.942
qLP-chr19-4	Chr19	148.41	3.82213	8.6925
qLP-chr19-5	Chr19	158.41	2.31887	5.8925
qLP-c23-1	Chr20	20.7	3.9	6.54
qLP-c23-2	Chr20	24.7	4.03	6.76
qGhLP-c23	Chr20	34	0	5.59
qLP-D9-1	Chr20	43.4	3.12	3.38
qLP23.1	Chr20	45.2	10.64	12.58
qLP23.1	Chr20	48.94	2.8	6.8
qTL-LP-E1-Chr23	Chr20	58.1	0	16
qLP-D9-2	Chr20	63.65	4.74	6.06
qLP-20-9	Chr20	68.34	11.5	6.12
qLP-chr20-1	Chr20	74.21	3.42082	9.8519
qLP-chr20-2	Chr20	83.51	2.39696	5.18
qLP23.2	Chr20	85.5	9.86	11.07
qLP-20-11	Chr20	96.25	3.38	1.84
qLP-chr20-3	Chr20	100.01	2.43384	5.2132
qLP-chr20-4	Chr20	105.21	3.09544	8.8683
qTL-LP-E4-Chr23	Chr20	150.206	0	26.047
qLP-chr20-5	Chr20	181.31	2.93926	6.4328
qLP-chr20-6	Chr20	192.71	2.75922	5.8586
QTLLP33.m	Chr21	0.01	5.25	7.83
QTLLP4.n	Chr21	2	2.98	4.1
QTLLP3.n	Chr21	12	3.04	5.91
qGhLP-c24	Chr21	15.4	0	4.44
qLP-chr21-1	Chr21	26.91	2.7744	5.3887
qLP-D8-1	Chr21	39.34	1.81	4.9
qLP-D8-1	Chr21	56.86	3.2	3.59
qLP21-1-2	Chr21	87	3.03	4.43
qLP-chr21-2	Chr21	89.31	2.62473	5.1027
qLP-chr21-3	Chr21	99.71	4	8.4709
qLP-21-14	Chr21	128.95	4.97	11.13
qLP-21-15	Chr21	133.64	5.2	11.4
qLP-chr21-4	Chr21	161.91	3.15401	6.2677
qLP21.1	Chr21	165.6	15.6	24.3
qLP-chr21-5	Chr21	168.41	4.01735	7.9099
qLP-chr21-6	Chr21	219.31	5.04121	9.7087
QTLLP2.j	Chr22	0	3	4.73
QTLLP5.j	Chr22	17.8	3	4.78
qLP-D3-1	Chr22	24.49	5.18	12.1
qTL-LP-E4-Chr17	Chr22	26.9	0	19.1901
qLP-c17-1	Chr22	29.9	7.79	15.52
qLP-c17-2	Chr22	34.61	4.14	7.91
qLP-chr22-1	Chr22	52.71	2.8308	7.1577
qLP-chr22-2	Chr22	54.81	2.19523	4.9868
qLP17.1	Chr22	61.9	2.3	4
qLP-C17-1	Chr22	91.3	10.81	27.51
qLP-C17-2	Chr22	94.9	11.7	26.4
qLP-C17-3	Chr22	100	3.39	10.8
qLP-c17-1	Chr22	101.97	2.69	5.85
qLP-C17-4	Chr22	114.6	6.51	15.78
qLP-C17-5	Chr22	118.7	7.72	19.38
qLP-23-1	Chr23	3	3.71	6.99
qGhLP-c22-1	Chr23	5.1	0	4.08
QTLLP2.g	Chr23	8.91	5.53	22.2
qGhLP-c22-2	Chr23	28.3	0	4.75
QTLLP3.g	Chr23	32.91	6.67	32.4
QTLLP4.g	Chr23	33.91	7.06	30.3
QTLLP5.g	Chr23	44.01	5.98	31.6
qLP-chr22-3	Chr23	78.51	2.38395	5.1992
GToQtlc22_1h	Chr23	81.9	3.88	12.6
qLP-chr23-1	Chr23	170.71	3.25813	6.893
qLP-chr24-1	Chr24	3.91	2.7679	5.6039
qLP-c21-3	Chr24	6.32	3.26	6.97
qLP-c21-1	Chr24	9.74	3.93	8.03
qLP-D11	Chr24	11.6	0	0
qLP-chr24-2	Chr24	14.21	2.27332	5.0817
qLP-c21-2	Chr24	18.38	3.96	8.11
qLP-chr24-3	Chr24	39.61	2.43601	5.0541
qLP-chr24-4	Chr24	50.41	5.44902	11.7162
qLP-chr24-5	Chr24	57.91	3.06941	6.5004
qLP-C21-1	Chr24	60	2.86	6.16
qLP-CH24-1*	Chr24	66.92	11.2	16.6
qLP-chr24-6	Chr24	68.41	3.18004	6.5233
qLP-chr24-7	Chr24	94.81	2.32755	4.6768
qLP-chr24-8	Chr24	104.41	3.07592	6.1977
qLP-D11-1	Chr24	106.62	2.64	2.73
GToQtlc21_1h	Chr24	108.8	3.33	10.4
qLP-chr24-9	Chr24	111.61	2.09544	4.2228
qLP-chr24-10	Chr24	119.71	2.16052	4.367
qLP-chr24-11	Chr24	130.31	2.75054	6.3047
qLP-16-CH24-2	Chr24	141.3	5.2	6.7
qLP21.1	Chr24	165.6	11.5	18.3
LP3a	Chr25	6	3	1
qLP-C25-1	Chr25	9.8	6.73	5.77
qLP-19(2010)	Chr25	18.1	2.13	5.5
qLP-19(F2:3)	Chr25	20.1	2.13	5.48
qLP-19b(F2)	Chr25	22.1	2.77	8.2
qGhLP-c19	Chr25	25.2	0	4.68
qLP-19(2011)	Chr25	26.8	2.01	8.6
qLP-19a(F2)	Chr25	29.5	2.3	5.91
qLP-D5-1	Chr25	30.82	1.86	4.3
qLP-chr19-1	Chr25	44.42	3.17	6.81
qLP19.1	Chr25	62.91	3.5	8.6
qLP-chr25-1	Chr25	90.91	3.34707	6.9716
qLP-chr25-2	Chr25	97.61	2.77657	5.9304
qLP-chr25-3	Chr25	105.31	2.49241	5.2758
qLP-CH25-1*	Chr25	107.65	12.5	17.7
qLP-chr25-4	Chr25	109.01	4.13666	8.4754
qLP-chr25-5	Chr25	112.21	2.25597	5.0408
qLP-chr25-6	Chr25	116.31	4.51627	9.2145
qLP-chr25-7	Chr25	126.41	2.37093	4.783
qLP-chr25-8	Chr25	143.81	2.49892	5.327
qLP-D6-1	Chr25	146.96	4.52	8.23
qLP-chr25-9	Chr25	149.01	3.43818	7.2346
qLP-chr25-10	Chr25	155.61	2.50542	8.4796
qLP-chr25-11	Chr25	156.61	3.31887	10.2442
qLP-chr25-12	Chr25	167.11	0.806941	1.7694
qLP-16-CH25-2	Chr25	174.63	5	6.5
qLP-chr25-13	Chr25	177.71	3.10846	7.6394
qLP-chr25-14	Chr25	189.71	2.80477	5.7726
qLP-c25-1	Chr26	30.91	2.93	5.98
qLP-chr26-1	Chr26	32.41	3.8243	7.792
qLP-c25-2	Chr26	42.58	2.83	5.16
qLP26.1	Chr26	49.5	3.9	8
qLP-chr26-2	Chr26	60.11	2.91757	6.614
qLP-chr26-4	Chr26	72.31	4.4859	9.8157
